# Supplementary material for: Metal and pH-Dependent Aptamer Binding of Tetracyclines Enabling Highly Sensitive Fluorescence Sensing
Source: MDPI journal article supplement (doi:10.3390/bios12090717), 2022-09-03
Supplement: s1 [file s1]

## Supporting Information

# Metal and pH-Dependent Aptamer Binding of Tetracyclines Enabling Highly Sensitive Fluorescence Sensing

Yichen Zhao, Biwen Gao, Peihuan Sun, Jiawen Liu, and Juewen Liu \*

Department of Chemistry, Waterloo Institute for Nanotechnology, Water Institute, University of Waterloo, Waterloo, ON, N2L 3G1, Canada

\* Correspondence: liujw@uwaterloo.ca

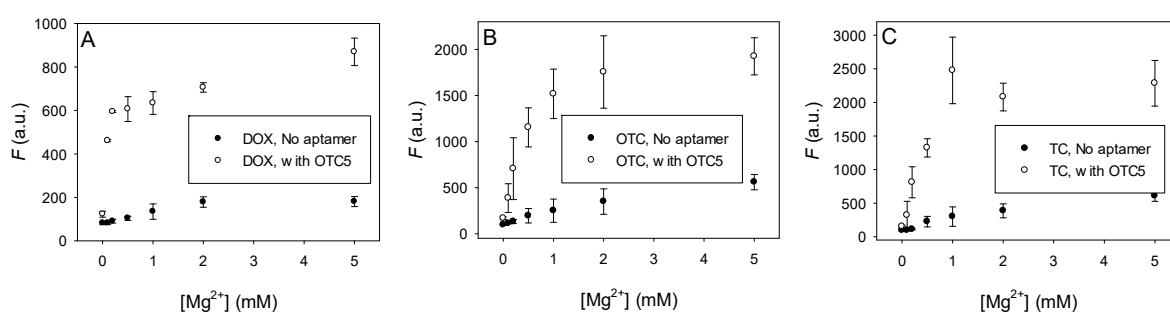

**Figure S1.** The fluorescence intensity of 100 nM (A) DOX, (B) OTC, and (C) TC alone and with 2  $\mu$ M of the OTC5 aptamer with increasing concentration of  $Mg^{2+}$  in 10 mM MES, pH 6.0 with 50 mM NaCl.

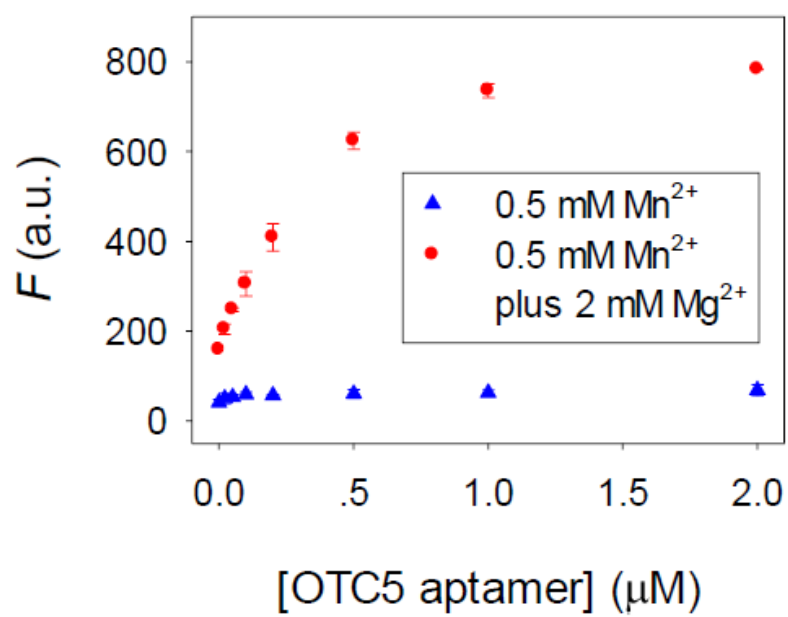

**Figure S2.** The fluorescence of 100 nM OTC as a function of OTC5 aptamer concentration in 0.5 mM Mn<sup>2+</sup> alone and with 0.5 mM Mn<sup>2+</sup> and 2 mM Mg<sup>2+</sup> mixture. The buffer was 10 mM MES, pH 6.0 with 100 mM NaCl.
